# Supplementary figures and images for: Identification of Potential Biomarkers of Septic Shock Based on Pathway and Transcriptome Analyses of Immune-Related Genes
Source: Hindawi journal article supplement (doi:10.1155/2023/9991613), 2023-08-05

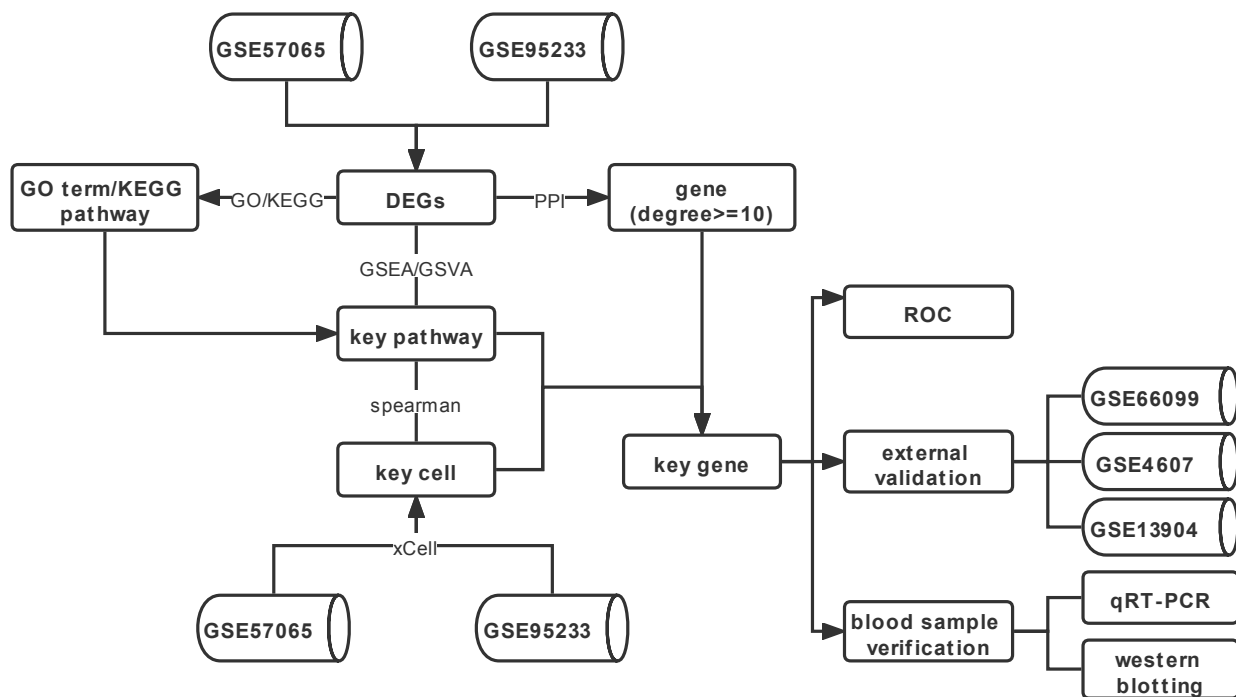

Supplement: f1 [file 9991613.f1.zip]
